# Supplementary material
Source: PubMed Central journal article supplement (PMC7852319)
Supplement: NIHMS1560362-supplement-Supplemental_Data_and_Methods.pdf [file NIHMS1560362-supplement-Supplemental_Data_and_Methods.pdf]

## Supporting Information

### Reference glycan structure libraries of primary human cardiomyocytes and pluripotent stem cell-derived cardiomyocytes reveal cell-type and culture stage-specific glycan phenotypes

Christopher Ashwood<sup>1,3</sup>, Matthew Waas<sup>1,3</sup>, Ranjuna Weerasekera<sup>1</sup>, Rebekah L. Gundry<sup>1,2,3</sup>

<sup>1</sup>Department of Biochemistry, Medical College of Wisconsin, Milwaukee, WI 53226, USA

<sup>2</sup>Center for Biomedical Mass Spectrometry Research, Medical College of Wisconsin, Milwaukee, WI 53226, USA

<sup>3</sup>Current Address: CardiOmics Program, Center for Heart and Vascular Research; Division of Cardiovascular Medicine; and Department of Cellular and Integrative Physiology, University of Nebraska Medical Center, Omaha, NE, 68198, USA

#### Table of Contents

| Content                                                                                                                                                               | Page |
|-----------------------------------------------------------------------------------------------------------------------------------------------------------------------|------|
| Supplemental Methods                                                                                                                                                  | S2   |
| <b>Figure S-0</b> Effect of make-up flow on glycan structure limit of detection                                                                                       | S5   |
| <b>Figure S-1</b> Examples of purity assessment for enriched primary CM and hiPSC-CM.                                                                                 | S6   |
| <b>Figure S-2</b> Cardiomyocyte enrichment artifact evaluation.                                                                                                       | S7   |
| <b>Figure S-3</b> Identified O-glycan structures in primary CM and whole heart tissue                                                                                 | S8   |
| <b>Figure S-4</b> Targeted data analysis evaluating the presence of a culture component non-human N-glycan structure (di-gal motif) in hiPSC-CM samples.              | S8   |
| <b>Figure S-5</b> Identified O-glycan structures in hiPSC-CM and relative signal of quantitative glycan structures over the differentiation period                    | S9   |
| <b>Figure S-6</b> Scatter plot of relative signal for N-glycans from hiPSC-CM significantly positively correlated (>0.7) to days of differentiation                   | S9   |
| <b>Figure S-7</b> Scatter plot of relative signal for N-glycans from hiPSC-CM significantly negatively correlated (<-0.7) to days of differentiation                  | S10  |
| <b>Figure S-8</b> Majority of glycan structural motifs do not majorly change for hiPSC-CM across days of differentiation.                                             | S11  |
| <b>Figure S-9</b> Map of the enzymes and metabolites responsible for identified and quantified glycan structures of homogenized heart tissue, primary CM and hiPSC-CM | S12  |
| <b>Figure S-10</b> Example of annotated MS2 spectra for several glycan structures in Figures 4 and 5                                                                  | S14  |

## Supplemental Methods

| Anonymized Donor Identification Number | Sex | Age | Cause of Death          |
|----------------------------------------|-----|-----|-------------------------|
| 10960                                  | F   | 75  | Stroke                  |
| 11225                                  | M   | 58  | Gunshot wound to head   |
| 11414                                  | M   | 57  | Intracranial hemorrhage |

|                                    | N-glycan analysis                                                            | O-glycan analysis   |
|------------------------------------|------------------------------------------------------------------------------|---------------------|
| Sample Amount for glycan release   | 64 µg of protein                                                             |                     |
| Sample Volume Prepared, Injected   | 59 µL dried glycans dissolved in solvent A + 1 µL Dextran Ladder ISTD, 20 µL |                     |
| Injection Mode                     | Full Loop Direct Inject                                                      |                     |
| Sample Loop                        | 20 µL                                                                        |                     |
| Stationary Phase                   | Thermo Scientific Hypercarb PGC 250 Å, 180 µm x 10 cm, 3 µm                  |                     |
| LC Solvent A                       | 100% H <sub>2</sub> O<br>10 mM Ammonium Bicarbonate                          |                     |
| LC Solvent B                       | 90% MeCN,<br>10 mM Ammonium Bicarbonate                                      |                     |
| LC Gradient                        | 0-25% B in 70 min<br>100% B for 10 min<br>0% B for 10 min                    |                     |
| LC Flow Rate                       | 2 µL/min                                                                     |                     |
| Column Temperature                 | 80 °C                                                                        | 40 °C               |
| Make-up Solvent                    | 100% MeOH                                                                    |                     |
| Make-up Flow Rate                  | 2 µL/min for 75 min<br>1 µL/min for 15 min                                   |                     |
| Mass Spectrometer                  | Thermo Orbitrap Velos                                                        |                     |
| Method Type                        | Top 9 Data Dependent MS2                                                     |                     |
| Spray Voltage                      | 2 kV                                                                         |                     |
| MS <sup>1</sup> Detector           | Orbitrap                                                                     |                     |
| MS <sup>1</sup> Scan Range         | 570-2000 <i>m/z</i>                                                          | 500-2000 <i>m/z</i> |
| MS <sup>1</sup> Resolution         | 15,000 @ 200 <i>m/z</i>                                                      |                     |
| MS <sup>1</sup> AGC Target         | 1e6                                                                          |                     |
| MS <sup>1</sup> Maximum IT         | 100 ms                                                                       |                     |
| MS <sup>2</sup> Detector           | IonTrap                                                                      |                     |
| MS <sup>2</sup> Scan Range         | Auto Normal                                                                  |                     |
| MS <sup>2</sup> Resolution         | Normal (0.5 <i>m/z</i> FWHM)                                                 |                     |
| Isolation Window                   | 2 <i>m/z</i>                                                                 |                     |
| MS <sup>2</sup> AGC Target         | 1e5                                                                          |                     |
| MS <sup>2</sup> Maximum IT         | 150 ms                                                                       |                     |
| Activation Type / Collision Energy | CID 33%, Wideband Activation                                                 |                     |
| Minimum Signal Req.                | 50                                                                           |                     |
| Dynamic Exclusion                  | 30 s, 10 Repeats, 5 s Exclusion Duration                                     |                     |

**Table S3. Flow cytometry sample preparation and data acquisition details.**

| <b>Sample Information</b>       |                                                                                                                                                                                                                                        |                              |                                                           |              |
|---------------------------------|----------------------------------------------------------------------------------------------------------------------------------------------------------------------------------------------------------------------------------------|------------------------------|-----------------------------------------------------------|--------------|
| <b>Cell type(s)</b>             | hiPSC-CM                                                                                                                                                                                                                               |                              |                                                           |              |
| <b>Cell line(s)</b>             | DF6-9-9T                                                                                                                                                                                                                               |                              |                                                           |              |
| <b>Passage #</b>                |                                                                                                                                                                                                                                        |                              |                                                           |              |
| <b>Dissociation Conditions:</b> | 1 mL of 0.5U/mL Liberase-TH (Sigma #5401135001), 50U/mL DNase I (Sigma #10104159001) in RPMI (Thermofisher #11875-093) for 30 min at 37 °C, followed by addition of 1 mL of TrypLE (TrypLE ThermoFisher #12605-010) for 5 min at 37 °C |                              |                                                           |              |
| <b>Total Cell Counts</b>        | 6.5 – 13 x 10 <sup>6</sup>                                                                                                                                                                                                             |                              |                                                           |              |
| <b># of Cells per Tube</b>      | 1 x 10 <sup>6</sup>                                                                                                                                                                                                                    |                              |                                                           |              |
| <b>Protocol Steps</b>           |                                                                                                                                                                                                                                        |                              |                                                           |              |
|                                 | <b>Time</b>                                                                                                                                                                                                                            | <b>Reagents</b>              | <b>Recipe, Catalog #s</b>                                 |              |
| <b>1. Fixation</b>              | 20 min                                                                                                                                                                                                                                 | <b>Wash Solution</b>         | DPBS-/- (Sigma #D8537)                                    |              |
| <b>2. Wash</b>                  | two x 3 mL                                                                                                                                                                                                                             | <b>Fixation Solution</b>     | 2% Formaldehyde (w/v) (ThermoFisher #28906) in 1X DPBS-/- |              |
| <b>3. Permeabilization</b>      | Performed as one 15 min incubation                                                                                                                                                                                                     | <b>Block Solution</b>        | 0.5% w/v BSA (Sigma #A7906) in DPBS-/-                    |              |
| <b>4. Wash</b>                  |                                                                                                                                                                                                                                        | <b>Permeabilization</b>      | 0.5% Saponin (w/v) (Sigma #47036) in Block Solution       |              |
| <b>5. Block</b>                 |                                                                                                                                                                                                                                        | <b>Resuspension Solution</b> | 0.5% w/v BSA in DPBS-/-                                   |              |
| <b>6. 1°Antibody</b>            | 45 min                                                                                                                                                                                                                                 |                              |                                                           |              |
| <b>7. Wash</b>                  | two x 3 mL                                                                                                                                                                                                                             |                              |                                                           |              |
| <b>8. Resuspension</b>          | 500 µL                                                                                                                                                                                                                                 |                              |                                                           |              |
| <b>Antibodies</b>               |                                                                                                                                                                                                                                        |                              |                                                           |              |
| <b>Target</b>                   | <b>Clone</b>                                                                                                                                                                                                                           | <b>Vendor</b>                | <b>Catalog #</b>                                          | <b>Lot #</b> |
| Troponin T2                     | 1C11                                                                                                                                                                                                                                   | Abcam                        | ab105439                                                  | various      |
| Isotype control                 | -                                                                                                                                                                                                                                      | eBiosciences                 | 11-4714                                                   | various      |
| <b>Instrument Configuration</b> |                                                                                                                                                                                                                                        |                              |                                                           |              |
| <b>Instrument</b>               | BD LSR II                                                                                                                                                                                                                              |                              |                                                           |              |
| <b>Laser line</b>               | 488nm (50mw)                                                                                                                                                                                                                           |                              |                                                           |              |
| <b>Emission filter</b>          | 525/50                                                                                                                                                                                                                                 |                              |                                                           |              |
| <b>Fluorochrome</b>             | FITC                                                                                                                                                                                                                                   |                              |                                                           |              |

**Table S4. Glycopeptides identified from Mills et al. which feature glycan compositions that were positively correlated to time of hiPSC-CM differentiation in our study.**

| <b>Protein</b>     | <b>Peptide</b>                                      | <b>Starting AA</b> | <b>Glycan Composition</b>         | <b>Sample</b>       |
|--------------------|-----------------------------------------------------|--------------------|-----------------------------------|---------------------|
| <b>CERU_HUMAN</b>  | K.EN[+1914.697]LTAPGSDSAVFFEQGT<br>TR.I             | 396                | HexNAc(4)Hex(5)<br>Fuc(2)         | <b>Heart tissue</b> |
| <b>HPT_HUMAN</b>   | K.VVLHPN[+1914.697]YSQVDIGLIK.L                     | 236                | HexNAc(4)Hex(5)<br>Fuc(2)         | <b>Heart tissue</b> |
| <b>A1AT_HUMAN</b>  | K.YLGN[+1914.697]ATAIFFLPDEGK.L                     | 268                | HexNAc(4)Hex(5)<br>Fuc(2)         | <b>Heart tissue</b> |
| <b>FETUA_HUMAN</b> | K.AALAAFNAQNN[+1914.697]GSNFQL<br>EEISR.A           | 166                | HexNAc(4)Hex(5)<br>Fuc(2)         | <b>Heart tissue</b> |
| <b>HRG_HUMAN</b>   | R.VIDFN[+1914.697]C[+57.021]TTSSVS<br>SALANTK.D     | 121                | HexNAc(4)Hex(5)<br>Fuc(2)         | <b>Heart tissue</b> |
| <b>PGS2_HUMAN</b>  | K.LGLSFNSISAVDN[+2100.761]GSLANT<br>PHLR.E          | 250                | HexNAc(5)Hex(4)<br>Fuc(1)NeuAc(1) | <b>3D Organoid</b>  |
| <b>CO6A2_HUMAN</b> | R.GTFTDC[+57.021]ALAN[+1914.697]<br>MTEQIR.Q        | 131                | HexNAc(4)Hex(5)<br>Fuc(2)         | <b>Heart tissue</b> |
| <b>CSPG2_HUMAN</b> | R.FEN[+1914.697]QTGFPPPSDR.F                        | 328                | HexNAc(4)Hex(5)<br>Fuc(2)         | <b>3D Organoid</b>  |
| <b>LAMA2_HUMAN</b> | R.YMQN[+1914.697]LTVEQPIEVK.K                       | 2645               | HexNAc(4)Hex(5)<br>Fuc(2)         | <b>3D Organoid</b>  |
| <b>LAMA2_HUMAN</b> | K.N[+1914.697]ESGIILLGSGGTPAPPR.R                   | 2558               | HexNAc(4)Hex(5)<br>Fuc(2)         | <b>3D Organoid</b>  |
| <b>BCAM_HUMAN</b>  | R.TQN[+1914.697]FTLLVQGSPELK.T                      | 437                | HexNAc(4)Hex(5)<br>Fuc(2)         | <b>Heart tissue</b> |
| <b>PGBM_HUMAN</b>  | R.SLTQGSLIVGDLAPVN[+1914.697]GTS<br>QGK.F           | 3765               | HexNAc(4)Hex(5)<br>Fuc(2)         | <b>3D Organoid</b>  |
| <b>PGBM_HUMAN</b>  | R.NQELEDNVHISPN[+1752.645]GSIITIV<br>GTRPSNHGTYSR.C | 3060               | HexNAc(4)Hex(5)<br>Fuc(2)         | <b>3D Organoid</b>  |
| <b>COEA1_HUMAN</b> | R.SFMVN[+1914.697]WTHAPGNVEK.Y                      | 368                | HexNAc(4)Hex(5)<br>Fuc(2)         | <b>Heart tissue</b> |

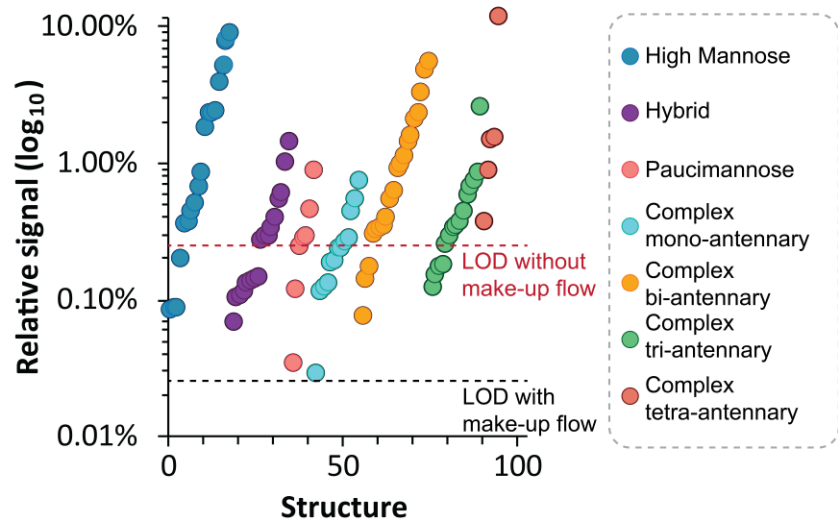

**Figure S0.** Effect of make-up flow on glycan structure limit of detection

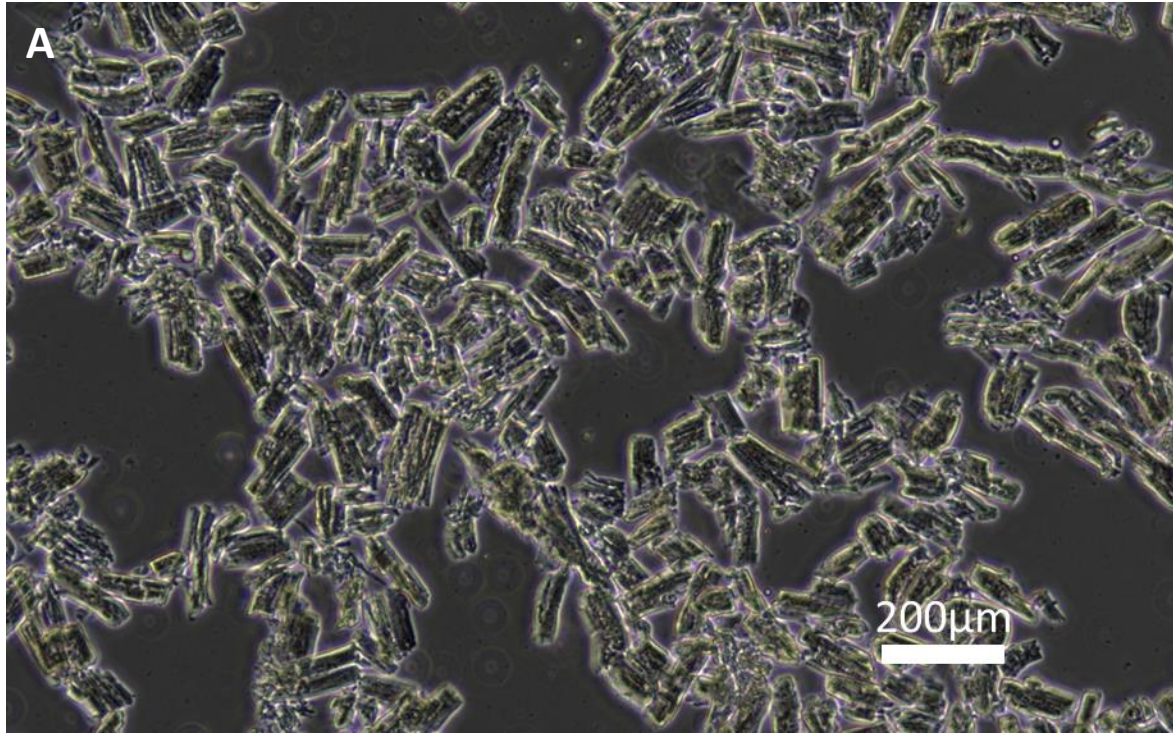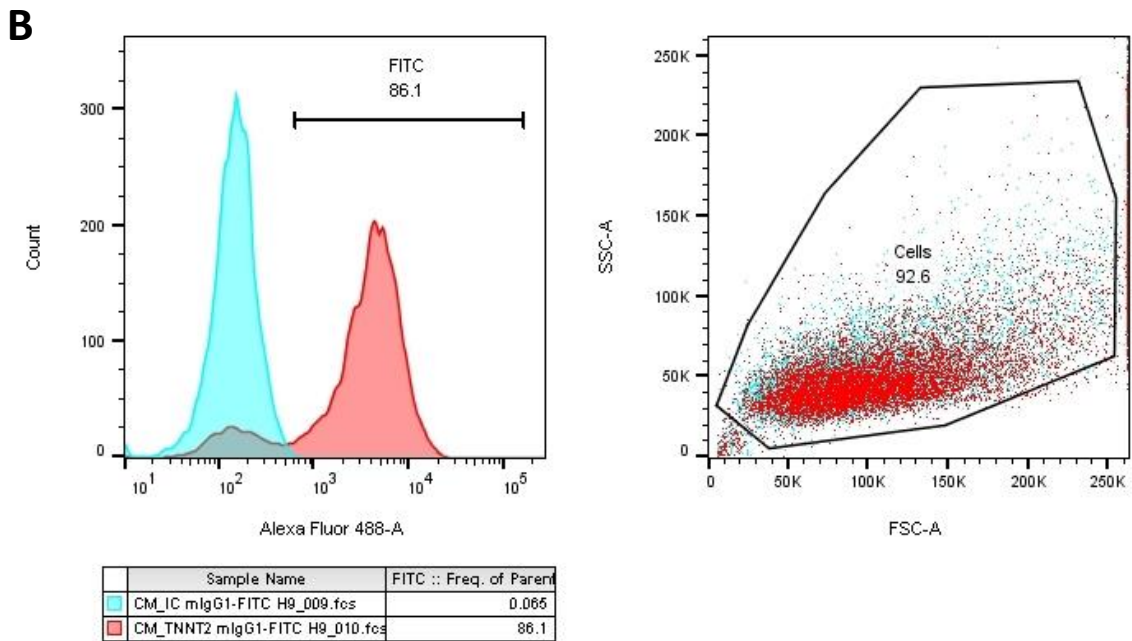

**Figure S1.** Examples of quality assessment for enriched primary CM and hiPSC-CM. **A** Bright-field image of cardiomyocyte-enriched samples from human heart tissue. **B** Representative example of percent troponin positivity in hiPSC-CM as determined by flow cytometry (isotope control is represented in blue, antibody for troponin is represented in red)

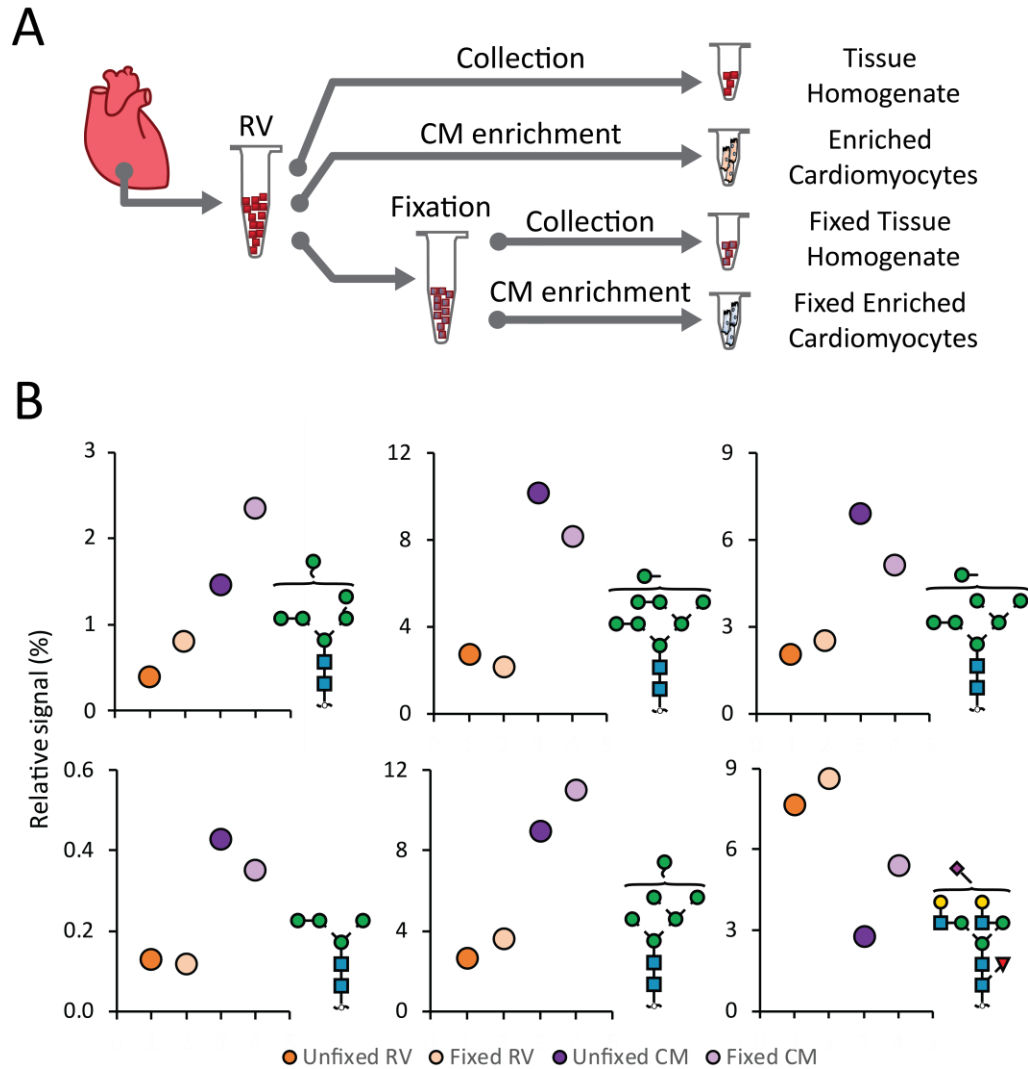

**Figure S2.** Evaluation of the possibility of artifacts owing to residual enzymatic activity during CM enrichment. **A** Experimental design to compare fixed and unfixed heart tissue homogenate and enriched CM. **B** Quantitative analysis of enriched CM glycans compared to cardiac tissue homogenate. For each sample type, no major differences are observed between unfixed and fixed samples.

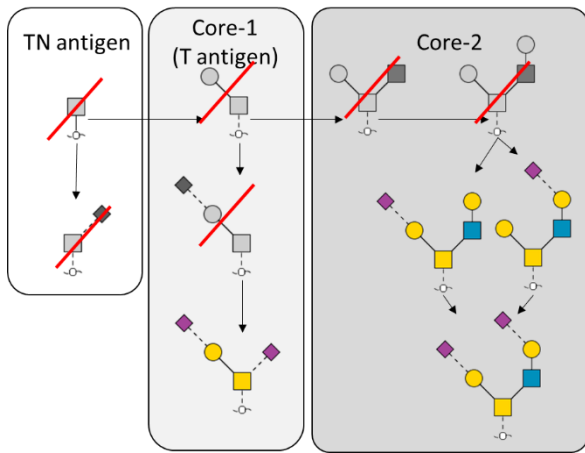

**Figure S3.** Identified O-glycan structures in primary CM and whole heart tissue

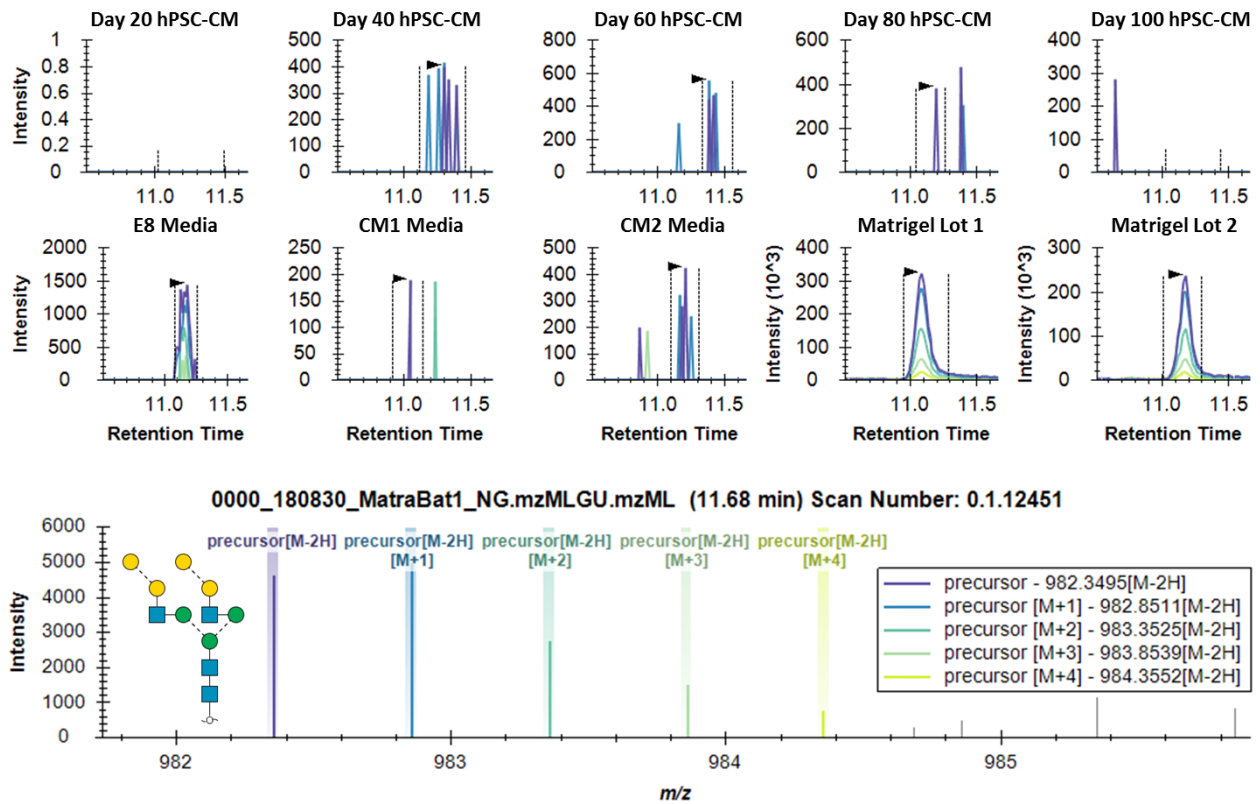

**Figure S4.** Targeted data analysis evaluating the presence of a culture component non-human N-glycan structure (di-gal motif) in hiPSC-CM samples



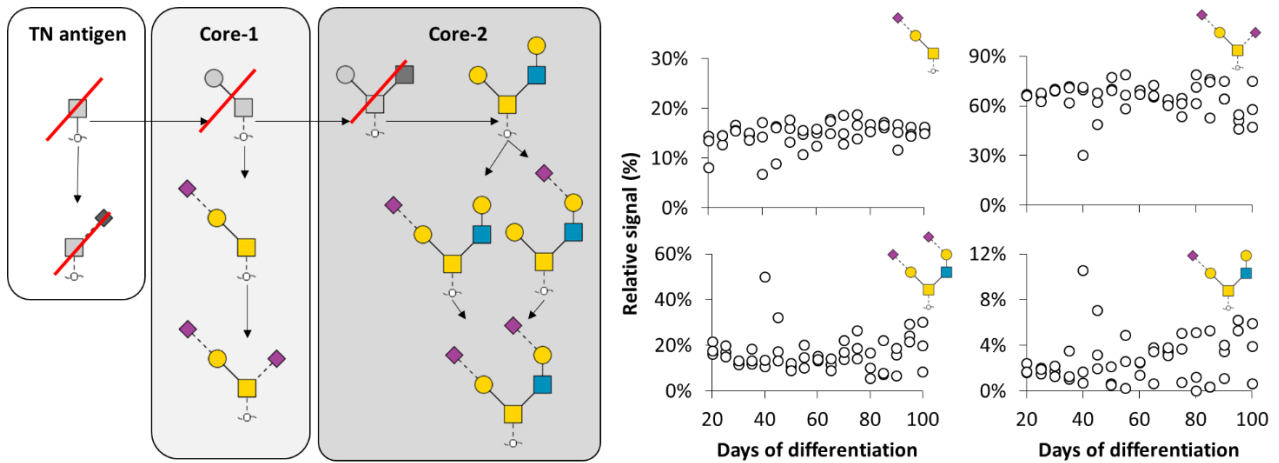

**Figure S5.** Identified O-glycan structures in hiPSC-CM and relative signal of quantitative glycan structures over the differentiation period

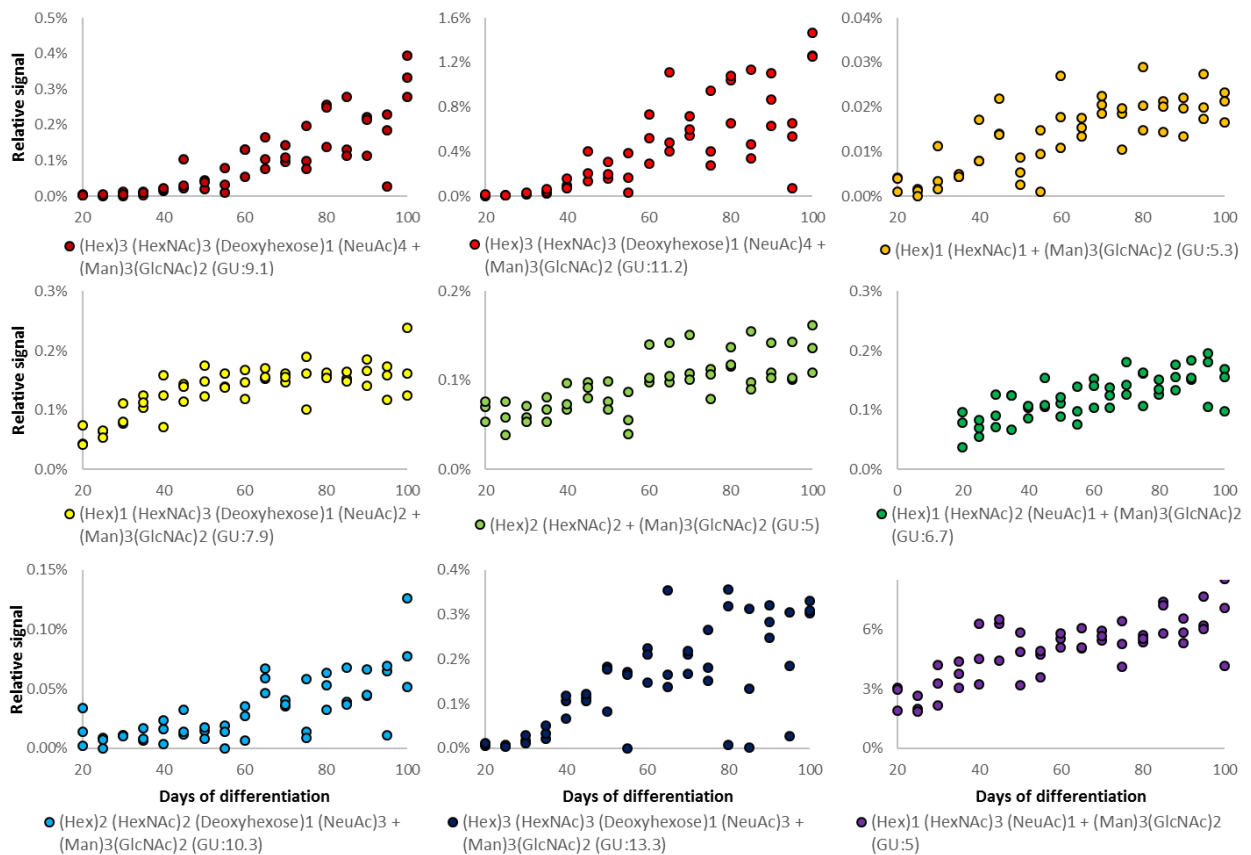

**Figure S6.** Scatter plot of relative signal for N-glycans from hiPSC-CM significantly positively correlated (>0.7) to days of differentiation

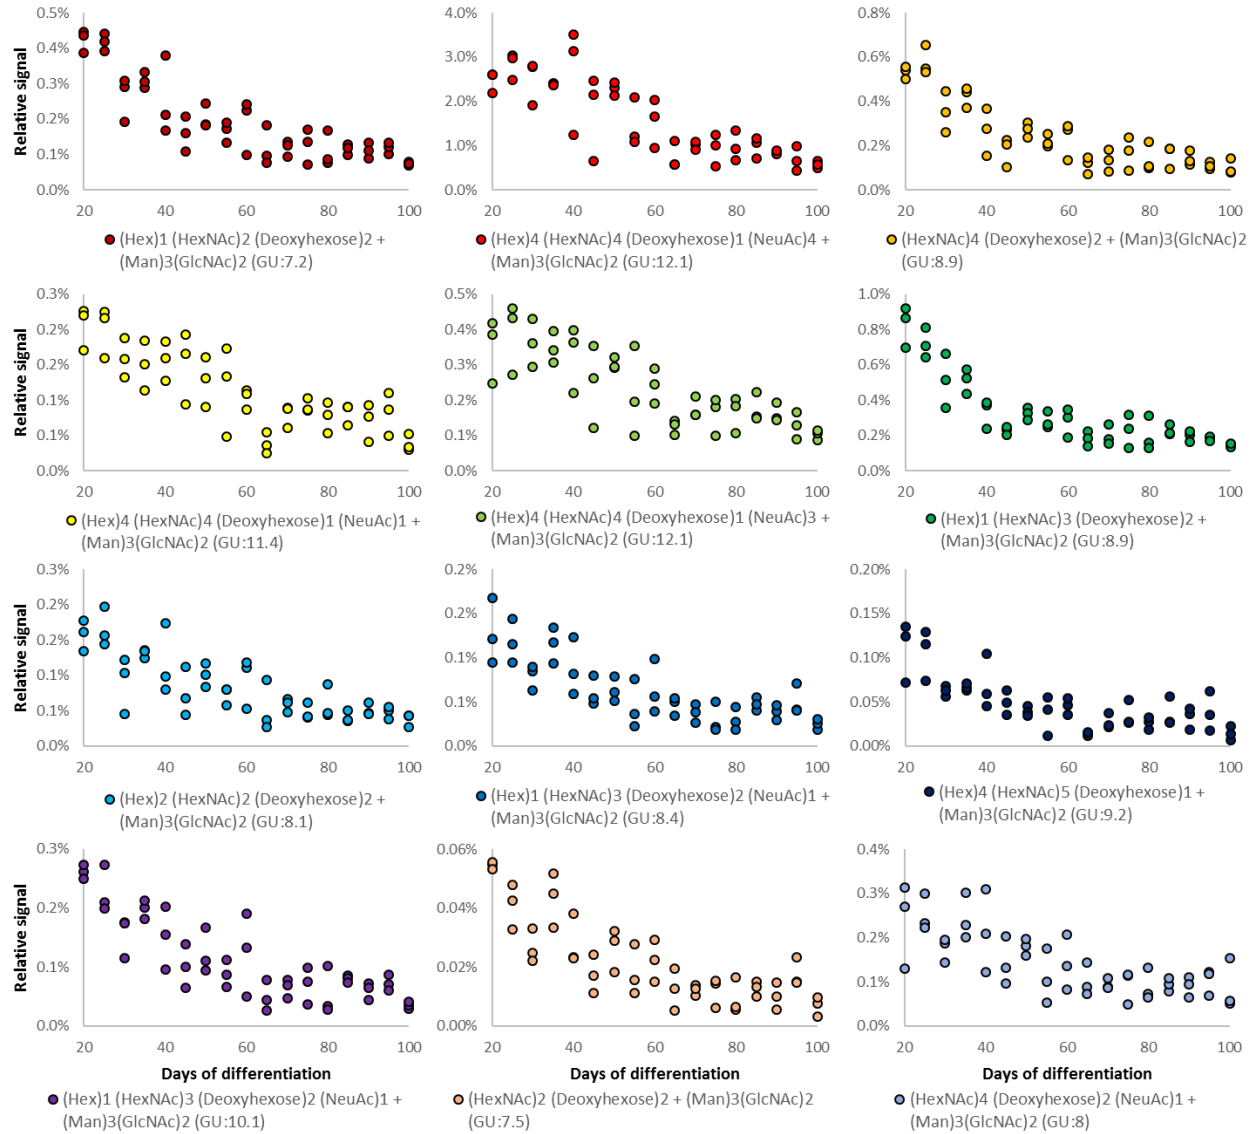

**Figure S7.** Scatter plot of relative signal for *N*-glycans from hiPSC-CM significantly negatively correlated ( $<-0.7$ ) to days of differentiation

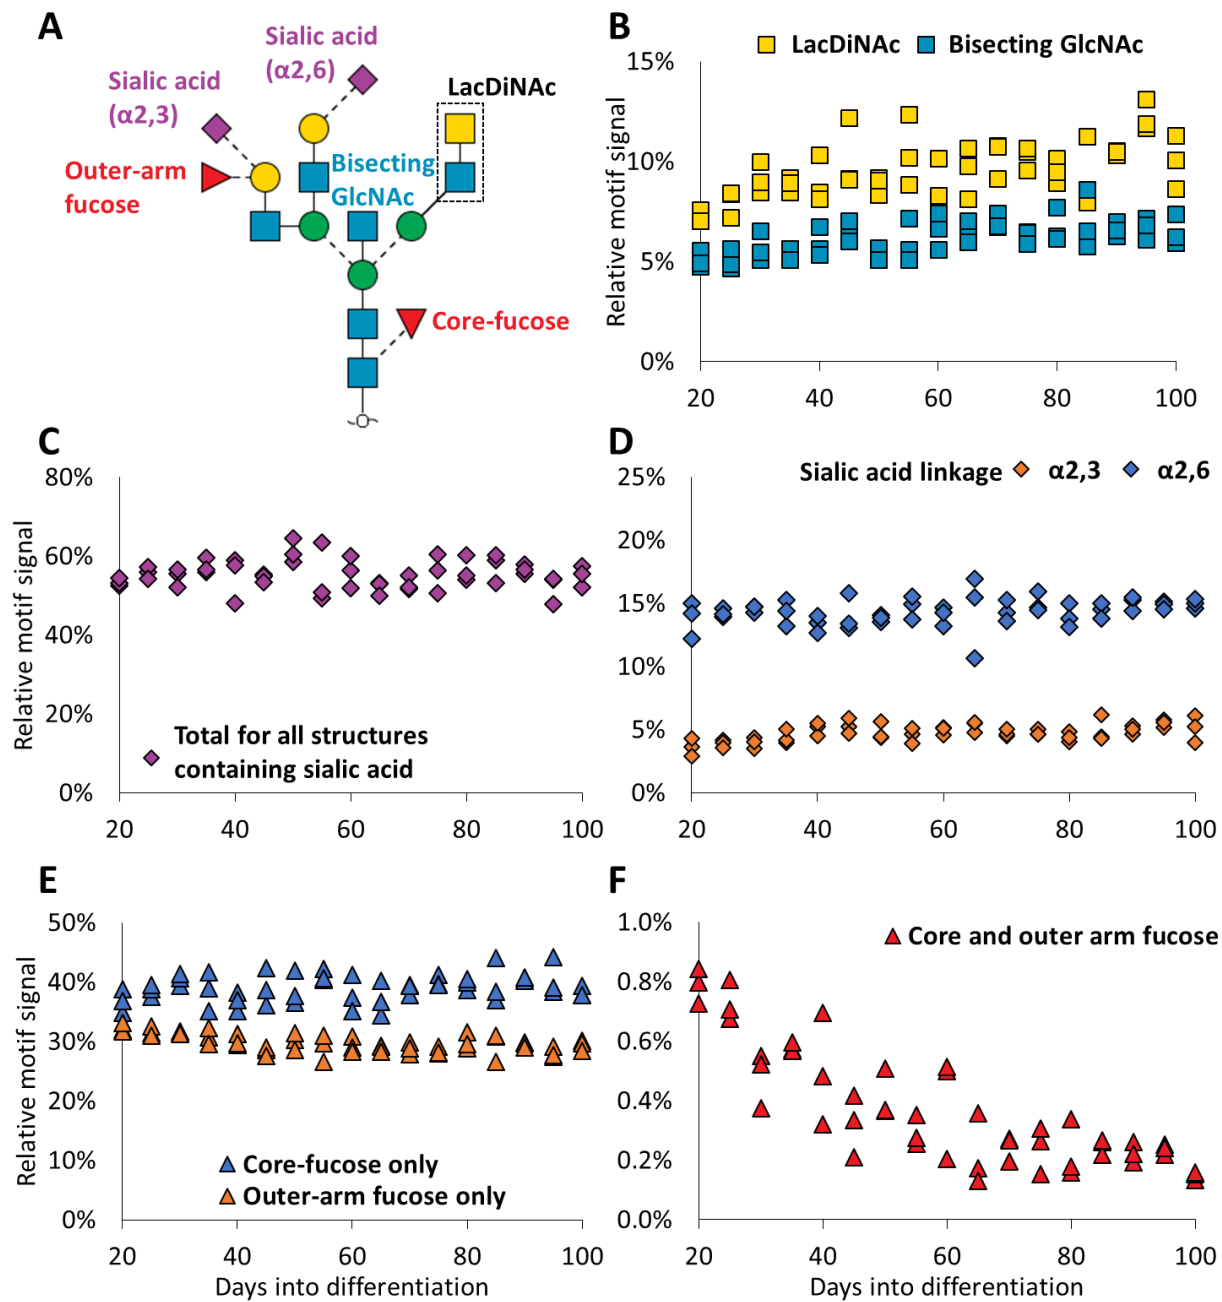

**Figure S8.** A majority of glycan structural motifs do not significantly change among hiPSC-CM collected throughout 100 days of differentiation. **A** Model N-glycan structure with motifs mapped to structure. **B-F** Scatter plots of relative signal for N-glycan structural motifs shown in A.

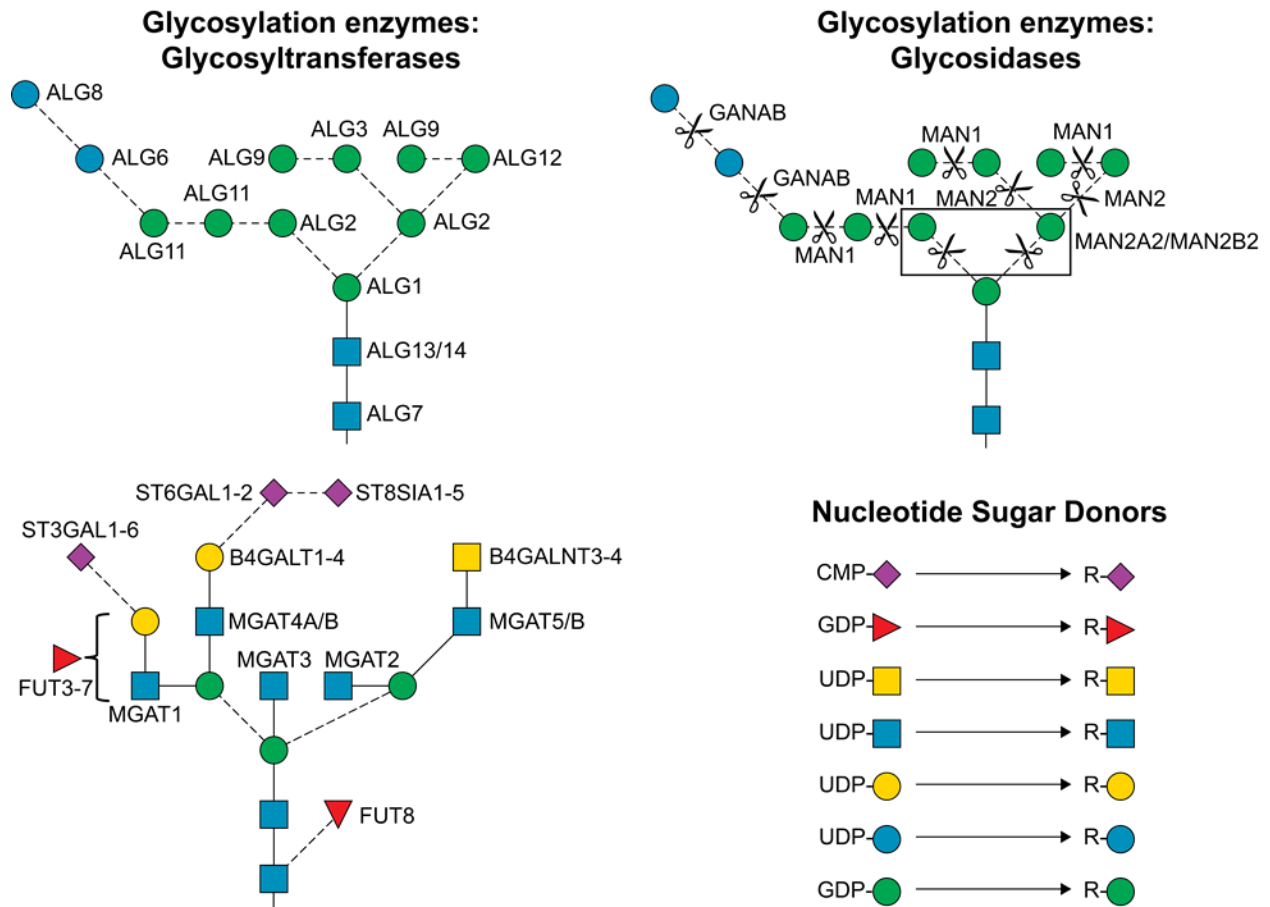

**Figure S9.** Map of the enzymes and metabolites responsible for identified and quantified glycan structures of homogenized heart tissue, primary CM and hiPSC-CM

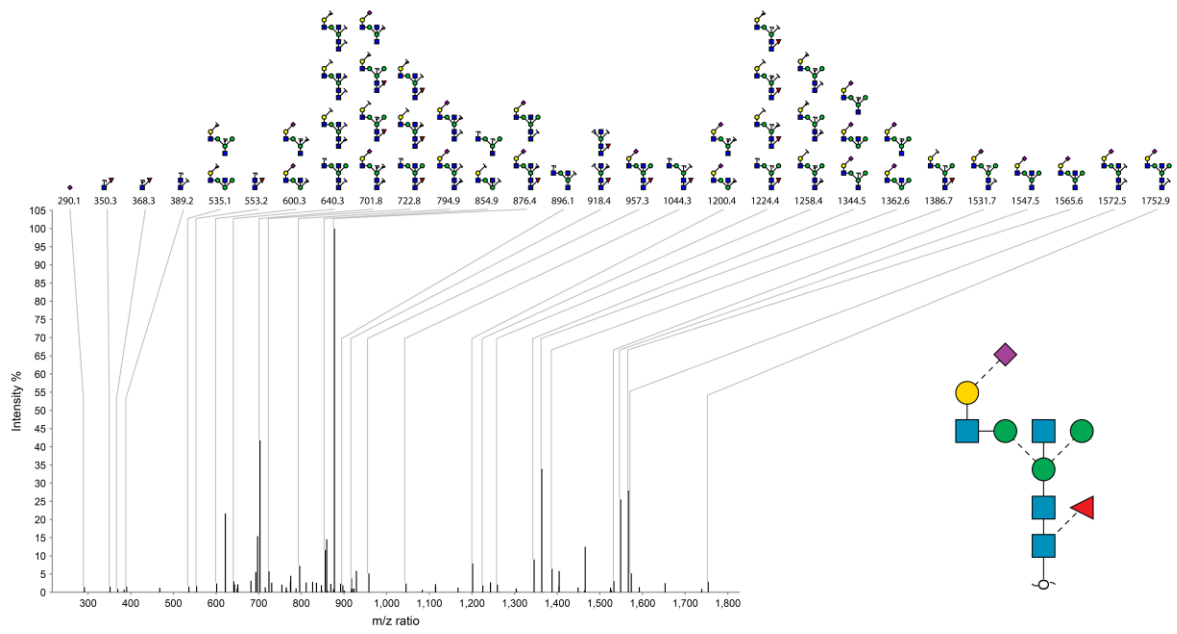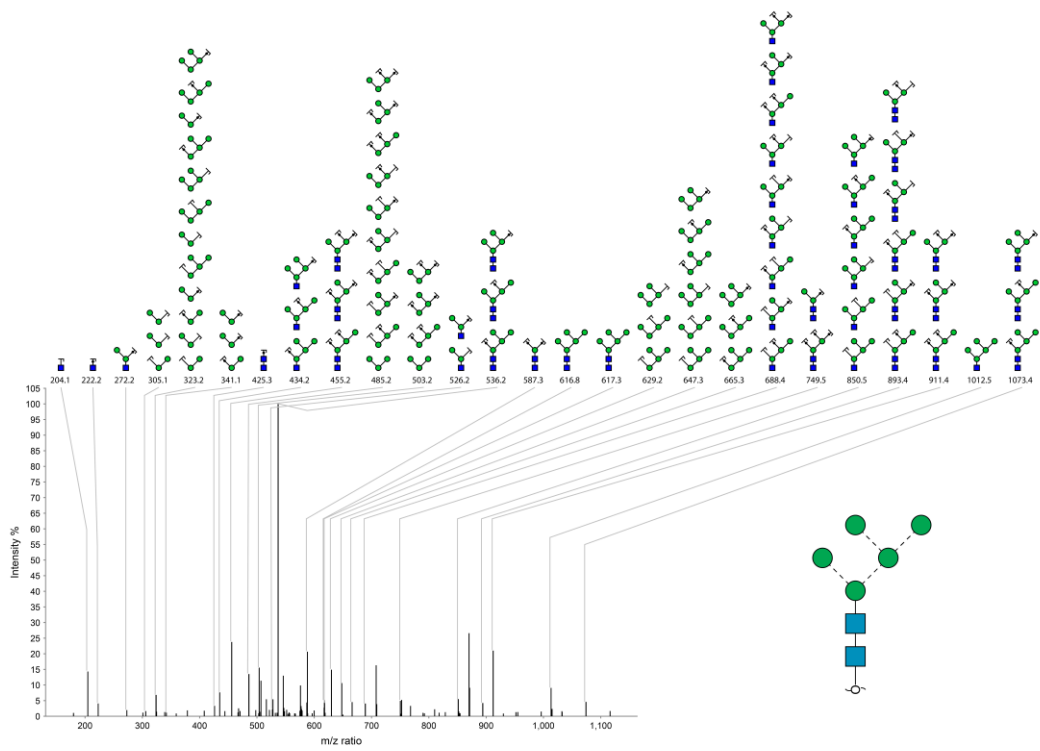

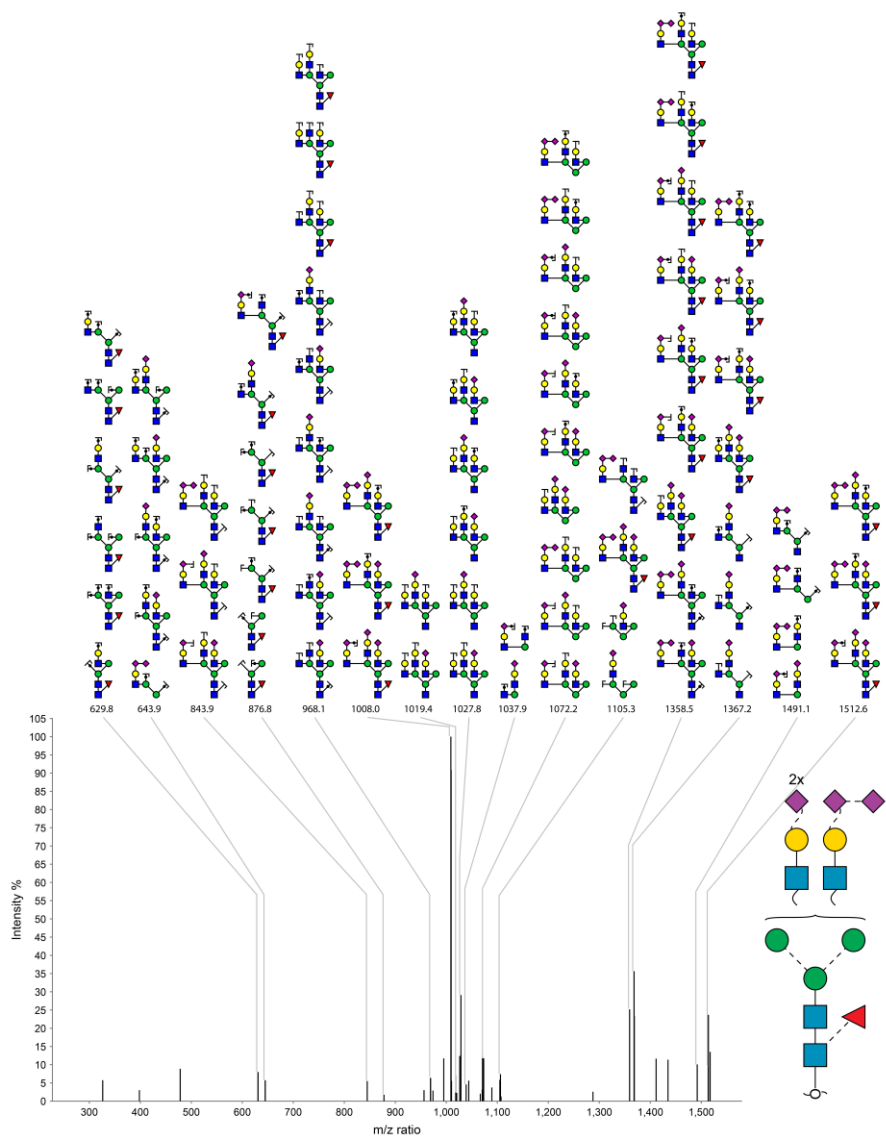

**Figure S10.** Example annotated MS2 spectra for several glycan structures in Figures 4 and 5.
